# Supplementary material
Source: PubMed Central journal article supplement (PMC9172262)
Supplement: NIHMS1812173-supplement-1.pdf [file NIHMS1812173-supplement-1.pdf]

## SUPPLEMENTARY DATA

| Supplementary Table 1. Search Terms |                                                                                                                                                                                                                                                                                                                                                                                                                                                                                                                                                                                                                                                                 |
|-------------------------------------|-----------------------------------------------------------------------------------------------------------------------------------------------------------------------------------------------------------------------------------------------------------------------------------------------------------------------------------------------------------------------------------------------------------------------------------------------------------------------------------------------------------------------------------------------------------------------------------------------------------------------------------------------------------------|
| Database                            | Search Terms                                                                                                                                                                                                                                                                                                                                                                                                                                                                                                                                                                                                                                                    |
| PubMed                              | ("stroke"[MeSH] OR "stroke"[tiab] OR "cerebrovascular accident"[tiab] OR "cerebrovascular disorder"[MeSH] OR "cerebrovascular disorder"[tiab] OR "cerebrovascular disease"[tiab]) AND ("artificial intelligence"[tiab] OR "machine learning"[tiab] OR "deep learning"[tiab] OR "supervised learning"[tiab] OR "unsupervised learning"[tiab] OR "neural network"[tiab] OR "heuristic"[tiab] OR "support vector machine"[tiab] OR "markov decision process"[tiab] OR "markov model"[tiab] OR "natural language"[tiab] OR "decision tree"[tiab] OR "k-nearest neighbor"[tiab] OR "k nearest neighbor"[tiab] OR "fuzzy c-mean"[tiab] OR "fuzzy c mean"[tiab])       |
| Embase                              | ('stroke':ti,ab,kw OR 'cerebrovascular accident':ti,ab,kw OR 'cerebrovascular disorder':ti,ab,kw OR 'cerebrovascular disease':ti,ab,kw) AND ('artificial intelligence':ti,ab,kw OR 'machine learning':ti,ab,kw OR 'deep learning':ti,ab,kw OR 'supervised learning':ti,ab,kw OR 'unsupervised learning':ti,ab,kw OR 'neural network':ti,ab,kw OR 'heuristic':ti,ab,kw OR 'support vector machine':ti,ab,kw OR 'markov decision process':ti,ab,kw OR 'markov model':ti,ab,kw OR 'natural language':ti,ab,kw OR 'decision tree':ti,ab,kw OR 'k-nearest neighbor':ti,ab,kw OR 'k nearest neighbor':ti,ab,kw OR 'fuzzy c-mean':ti,ab,kw OR 'fuzzy c mean':ti,ab,kw) |
| Scopus                              | TITLE-ABS-KEY ( ( "stroke"OR"cerebrovascular accident"OR"cerebrovascular disorder"OR"cerebrovascular disease" )AND( "artificial intelligence"OR"machine learning"OR"deep learning"OR"supervised learning"OR"unsupervised learning"OR"neural network"OR"heuristic"OR"support vector machine"OR"markov decision process"OR"markov model"OR"natural language"OR"decision tree"OR"k-nearest neighbor"OR"k nearest neighbor"OR"fuzzy c-mean"OR"fuzzy c mean" ) )                                                                                                                                                                                                     |
